# Supplementary material for: The Functional Differences between the GroEL Chaperonin of Escherichia coli and the HtpB Chaperonin of Legionella pneumophila Can Be Mapped to Specific Amino Acid Residues
Source: MDPI journal article supplement (doi:10.3390/biom12010059), 2021-12-31
Supplement: s1 [file s1]

**Supplementary Table S1.** Preparation of Synthetic Defined (SD) media<sup>a</sup>.

| Component                      | Sigma Cat. No.      | Amount (per L) | Type of SD medium |         |     |     |       |         |
|--------------------------------|---------------------|----------------|-------------------|---------|-----|-----|-------|---------|
|                                |                     |                | SD/-Leu           | SD/-Trp | DDO | QDO | QDO/A | QDO/X/A |
| Yeast nitrogen base without aa | Y-0626              | 7 g            | +                 | +       | +   | +   | +     | +       |
| Glucose                        | G-8270              | 20 g           | +                 | +       | +   | +   | +     | +       |
| Adenine hemisulfate salt       | A-3159              | 20 mg          | +                 | +       | +   | –   | –     | –       |
| Uracil                         | U-0750              | 12 mg          | +                 | +       | +   | +   | +     | +       |
| L-Arginine HCl                 | A-5131              | 20 mg          | +                 | +       | +   | +   | +     | +       |
| L-Histidine HCl monohydrate    | H-8125              | 20 mg          | +                 | +       | +   | –   | –     | –       |
| L-Isoleucine                   | I-2752              | 20 mg          | +                 | +       | +   | +   | +     | +       |
| L-Leucine                      | L-8000              | 20 mg          | –                 | +       | –   | –   | –     | –       |
| L-Lysine HCl                   | L-5626              | 20 mg          | +                 | +       | +   | +   | +     | +       |
| L-Methionine                   | M-9625              | 20 mg          | +                 | +       | +   | +   | +     | +       |
| L-Phenylalanine                | P-2126              | 30 mg          | +                 | +       | +   | +   | +     | +       |
| L-Threonine                    | T-8625              | 20 mg          | +                 | +       | +   | +   | +     | +       |
| L-Serine                       | S-4500              | 20 mg          | +                 | +       | +   | +   | +     | +       |
| L-Tryptophan                   | T-0254              | 30 mg          | +                 | –       | –   | –   | –     | –       |
| L-Tyrosine                     | T-3754              | 20 mg          | +                 | +       | +   | +   | +     | +       |
| L-Valine                       | V-0500              | 90 mg          | +                 | +       | +   | +   | +     | +       |
| Aureobasidin A <sup>b,c</sup>  | 630466 <sup>b</sup> | 200 µg         | –                 | –       | –   | –   | +     | +       |
| X-α-Gal <sup>b,c</sup>         | 630463 <sup>b</sup> | 40 mg          | –                 | –       | –   | –   | –     | +       |

<sup>a</sup> These media can be prepared liquid, or solidified with 15 g/L bacteriological agar. QDO/X/A was only prepared in solidified form.

<sup>b</sup> These media components were not from Sigma-Aldrich, and the Catalog Nos. given are from Clontech.

<sup>c</sup> Aureobasidin A stock solution had 1 mg dissolved in 2 ml of absolute ethanol (500 µg/ml) and was stored at 4°C. X-α-Gal stock solution had 100 mg dissolved in 5 mL of dimethylformamide (20 mg/mL) and was stored at –20°C in the dark.
